# Supplementary material
Source: publisher figshare collection journal article supplement (https://sage.figshare.com/ndownloader/files/12765380)
Supplement: Supplementary file 1 [file 12765380]

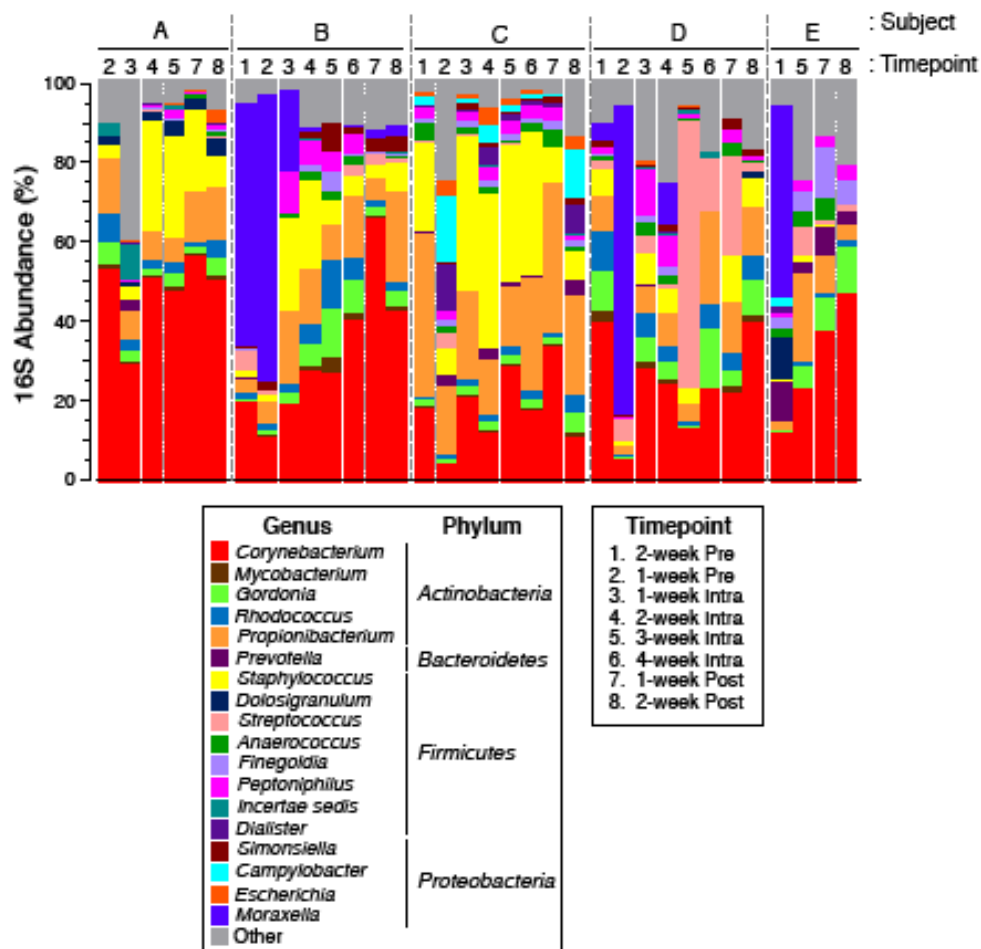

**Supplemental Figure 1.** Changes in nasal microbiota accompanying INS and mupirocin treatment. Relative abundances of nasal bacterial genera (genera with mean relative abundances <0.5% are aggregated in the “Other” category) are displayed for each sampling timepoint (1 week intervals). The legend displays the color-coding of genera, along with the phyla to which these taxa belong (i.e., Actinobacteria, Bacteroidetes, Firmicutes, Proteobacteria). Subjects A-D were treated with intranasal steroids while subject E was treated with topical mupirocin.
